# Supplementary material for: Agronomic, Physicochemical, Aromatic and Sensory Characterization of Four Sweet Cherry Accessions of the Campania Region
Source: MDPI journal article supplement (doi:10.3390/plants12030610), 2023-01-30
Supplement: s1 [file s1]

**Table S1.** The International Union for the Protection of New Varieties of Plants (UPOV) of the four sweet cherry accessions (Mulegnana Riccia, Mulegnana Nera, Montenero and Limoncella) compared to two standard cultivars (Lapins and 'Ferrovia).

| <b>UPOV descriptors</b>                            | <b>Mulegnana Riccia</b> | <b>Mulegnana Nera</b>             | <b>Montenero</b>                  | <b>Limoncella</b>  | <b>Lapins</b>      | <b>Ferrovia</b>    |
|----------------------------------------------------|-------------------------|-----------------------------------|-----------------------------------|--------------------|--------------------|--------------------|
| Tree: vigor                                        | Medium                  | Medium                            | Medium                            | Medium             | Medium             | Medium             |
| Tree: habit                                        | Spreading               | Spreading                         | Spreading                         | Semi-upright       | Drooping           | Semi-upright       |
| Tree: branching                                    | Strong                  | Medium                            | Medium                            | Strong             | Medium             | Medium             |
| Young shoot: anthocyanin coloration of apex        | Medium                  | Medium                            | Medium                            | Weak               | Medium             | Medium             |
| Young shoot: pubescence of apex                    | Medium                  | Medium                            | Medium                            | Medium             | Medium             | Medium             |
| One-year-old shoot: length of internode            | Normal                  | Normal                            | Normal                            | Normal             | Normal             | Normal             |
| One-year-old shoot: number of lenticels            | Medium                  | Medium                            | Medium                            | Medium             | Medium             | Medium             |
| One-year-old shoot: thickness                      | Medium                  | Medium                            | Medium                            | Medium             | Thick              | Medium             |
| Leaf blade: length                                 | Medium                  | Long                              | Long                              | Long               | Long               | Medium             |
| Leaf blade: width                                  | Medium                  | Medium                            | Broad                             | Medium             | Medium             | Medium             |
| Leaf blade: ratio length/width                     | Medium                  | Medium                            | Medium                            | Medium             | Large              | Medium             |
| Leaf blade: intensity of green color of upper side | Medium                  | Medium                            | Medium                            | Medium             | Medium             | Medium             |
| Leaf: length of petiole                            | Long                    | Long                              | Long                              | Long               | Long               | Long               |
| Leaf: ratio length of blade / length of petiole    | Medium                  | Large                             | Medium                            | Medium             | Small              | Medium             |
| Leaf: presence of nectaries                        | Present                 | Present                           | Present                           | Present            | Present            | Present            |
| Nectaries: color                                   | Light red               | Dark red                          | Light red                         | Light red          | Light red          | Light red          |
| Flower: diameter                                   | Medium                  | Large                             | Medium                            | Small              | Medium             | Medium             |
| Flower: shape of petal                             | Broad obovate           | Circular                          | Medium obovate                    | Medium obovate     | Broad obovate      | Broad obovate      |
| Flower: arrangement of petals                      | Overlapping             | Free                              | Intermediate                      | Free               | Overlapping        | Intermediate       |
| Fruit: Size                                        | Medium                  | Medium                            | Large                             | Medium             | Large              | Large              |
| Fruit: Shape                                       | Cordate                 | Reniform                          | Reniform                          | Cordate            | Cordate            | Cordate            |
| Fruit: Pistil end                                  | Flat                    | Flat                              | Flat                              | Flat               | Flat               | Pointed            |
| Fruit: Suture                                      | Weakly conspicuous      | Absent or very weakly conspicuous | Absent or very weakly conspicuous | Weakly conspicuous | Weakly conspicuous | Weakly conspicuous |
| Fruit: Length of stalk                             | Medium                  | Long                              | Medium                            | Long               | Medium             | Medium             |
| Fruit: Thickness of stalk                          | Medium                  | Medium                            | Thin                              | Medium             | Medium             | Medium             |
| Fruit: Abscission layer between stalk and fruit    | Present                 | Present                           | Present                           | Present            | Present            | Present            |

|                                                |                |                |                |                   |                |          |
|------------------------------------------------|----------------|----------------|----------------|-------------------|----------------|----------|
| Fruit: Color of skin                           | Dark red       | Dark red       | Red            | Yellow with blush | Dark red       | Dark red |
| Fruit: Size of lenticels on skin               | Medium         | Large          | Small          | Medium            | Large          | Medium   |
| Fruit: Number of lenticels on skin             | Few            | Few            | Many           | Few               | Many           | Medium   |
| Fruit: Thickness of skin                       | Medium         | Thick          | Thick          | Medium            | Thick          | Thick    |
| Fruit: Color of flesh                          | Medium red     | Dark red       | Medium red     | Yellow            | Medium red     | Pink     |
| Fruit: Color of juice                          | Red            | Red            | Red            | Light yellow      | Red            | Red      |
| Fruit: Firmness                                | Medium         | Medium         | Firm           | Medium            | Medium         | Medium   |
| Fruit: Acidity                                 | Medium         | Medium         | Medium         | Medium            | Medium         | Medium   |
| Fruit: Sweetness                               | Medium         | Medium         | Low            | Medium            | Hight          | Hight    |
| Fruit: Juiciness                               | Strong         | Medium         | Medium         | Strong            | Medium         | Medium   |
| Stone: size                                    | Small          | Medium         | Medium         | Medium            | Medium         | Medium   |
| Stone: shape in ventral view                   | Broad elliptic | Broad elliptic | Broad elliptic | Broad elliptic    | Broad elliptic | Circular |
| Attributed                                     |                |                |                |                   |                |          |
| Fruit: ratio weight of fruit / weight of stone | Medium         | Medium         | Medium         | Medium            | Medium         | Medium   |
| Time of beginning of flowering                 | Medium         | Medium         | Early          | Medium            | Medium         | Late     |
| Time of beginning of fruit ripening            | Medium         | Medium         | Early          | Early             | Medium         | Medium   |

**Table S2.** Volatile organic compounds (VOCs) detected of the four sweet cherry accessions (Mulegnana Riccia, Mulegnana Nera, Montenero and Limoncella) compared to two standard cultivars (Lapins and 'Ferrovia) and their identification codes.

| Metabolite                | Code | <sup>a</sup> RI/RI <sub>sp</sub> | <sup>b</sup> ID | Metabolite              | Code | <sup>a</sup> RI/RI <sub>sp</sub> | <sup>b</sup> ID |
|---------------------------|------|----------------------------------|-----------------|-------------------------|------|----------------------------------|-----------------|
| <b>Aldehydes</b>          |      |                                  |                 | <b>Terpenes</b>         |      |                                  |                 |
| Hexanal                   | Ald1 | 1084/1086                        | RI/MS/S         | dl-Limonene             | T1   | 1214/1215                        | RI/MS/S         |
| <i>cis</i> -3-Hexenal     | Ald2 | 1148/1148                        | RI/MS           | β-Ocimene               | T2   | 1248/1248                        | RI/MS           |
| 2-Hexenal                 | Ald3 | 1242/1248                        | RI/MS/S         | Ocymene                 | T3   | 1269/1259                        | RI/MS/S         |
| Octanal                   | Ald4 | 1309/1308                        | RI/MS/S         | Linalool                | T4   | 1549/1549                        | RI/MS/S         |
| Nonanal                   | Ald5 | 1401/1401                        | RI/MS/S         | α-Terpineol             | T5   | 1703/1702                        | RI/MS/S         |
| Decanal                   | Ald6 | 1506/1505                        | RI/MS/S         | Myrtenol                | T6   | 1808/1808                        | RI/MS/S         |
| Benzaldehyde              | Ald7 | 1530/1532                        | RI/MS/S         | Geraniol                | T7   | 1858/1858                        | RI/MS/S         |
| Dodecanal                 | Ald8 | 1716/1713                        | RI/MS/S         | <b>Esters</b>           |      |                                  |                 |
| <b>Alcohols</b>           |      |                                  |                 | Hexyl acetate           | E1   | 1289/1289                        | RI/MS/S         |
| 1-Penten-3-ol             | Al1  | 1188/1189                        | RI/MS/S         | 2-Hexen-1-ol acetate    | E2   | 1346/1342                        | RI/MS/S         |
| 1-Pentanol                | Al2  | 1223/1222                        | RI/MS/S         | 2-Hexenyl butyrate      | E3   | 1479/1475                        | RI/MS/S         |
| 3-Methyl-3-buten-1-ol     | Al3  | 1235/1236                        | RI/MS/S         | <b>Others</b>           |      |                                  |                 |
| 3-Methyl-2-buten-1-ol     | Al4  | 1336/1334                        | RI/MS/S         | 6-Methyl-5-hepten-2-one | O1   | 1350/1348                        | RI/MS/S         |
| 1-Hexanol                 | Al5  | 1340/1339                        | RI/MS/S         | 3-Methylbutanoic acid   | O2   | 1680/1680                        | RI/MS/S         |
| <i>trans</i> 3-Hexen-1-ol | Al6  | 1367/1366                        | RI/MS/S         |                         |      |                                  |                 |
| <i>cis</i> 3-Hexen-1-ol   | Al7  | 1374/1374                        | RI/MS/S         |                         |      |                                  |                 |
| <i>cis</i> 2-Hexen-1-ol   | Al8  | 1394/1394                        | RI/MS/S         |                         |      |                                  |                 |
| 1-Octen-3-ol              | Al9  | 1446/1446                        | RI/MS/S         |                         |      |                                  |                 |
| 2-Ethyl-1-hexanol         | Al10 | 1484/1484                        | RI/MS/S         |                         |      |                                  |                 |
| 1-Octanol                 | Al11 | 1498/1499                        | RI/MS/S         |                         |      |                                  |                 |
| Benzyl alcohol            | Al12 | 1881/1882/                       | RI/MS/S         |                         |      |                                  |                 |
| Phenethyl alcohol         | Al13 | 1871/1871                        | RI/MS/S         |                         |      |                                  |                 |
| Phenol                    | Al14 | 1882/1881                        | RI/MS/S         |                         |      |                                  |                 |

<sup>a</sup>RI: Relative retention indices on polar column reported in literature by [www.pherobase.com](http://www.pherobase.com); [www.flavornet.org](http://www.flavornet.org); [www.ChemSpider.com](http://www.ChemSpider.com); [webbook.nist.gov](http://webbook.nist.gov); RI<sub>sp</sub>: Relative retention indices calculated against n-alkanes (C<sub>8</sub>-C<sub>40</sub>) on HP-Innowax column; <sup>b</sup>Identification method as indicated by the following: RI: Kovats retention index on a on HP-Innowax column; MS: NIST and Wiley libraries spectra; S: co-injection with authentic standard compounds on the HP-Innowax column

**Figure S1.** Sensorial traits of the four sweet cherry accessions (Mulegnana Riccia, Mulegnana Nera, Montenero and Limoncella) compared to two standard cultivars (Lapins and 'Ferrovia).

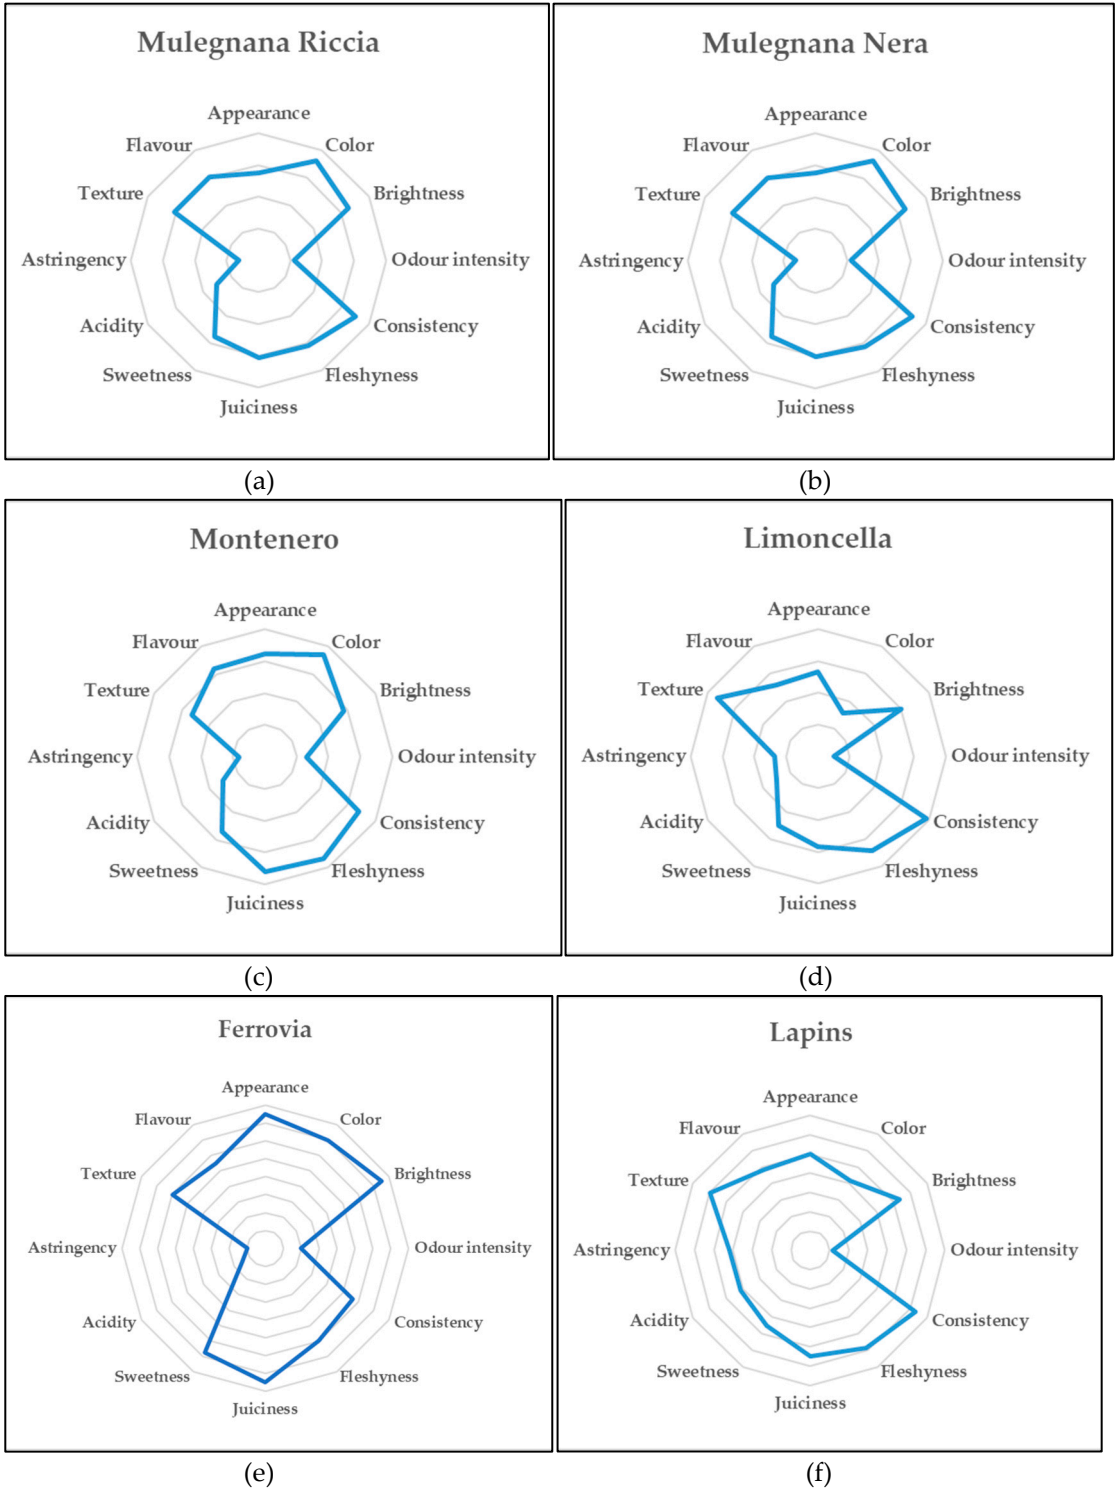

**Table S3.** Sensory sheet prepared for the panel test of the four sweet cherry accessions (Mulegnana Riccia, Mulegnana Nera, Montenero and Limoncella) compared to two standard cultivars (Lapins and ‘Ferrovia).

| VISUAL SENSATIONS        |                                        |  |
|--------------------------|----------------------------------------|--|
| Appearance               | ○ ○ ○ ○ ○ ○ ○ ○ ○ ○                    |  |
| Color                    | ○ ○ ○ ○ ○ ○ ○ ○ ○ ○<br>Red _____ Brown |  |
| Brightness               | ○ ○ ○ ○ ○ ○ ○ ○ ○ ○                    |  |
| OLFACTORY SENSATIONS     |                                        |  |
| Odour intensity          | ○ ○ ○ ○ ○ ○ ○ ○ ○ ○                    |  |
| TASTE/TACTILE SENSATIONS |                                        |  |
| Consistency              | ○ ○ ○ ○ ○ ○ ○ ○ ○ ○                    |  |
| Fleshyness of the pulp   | ○ ○ ○ ○ ○ ○ ○ ○ ○ ○                    |  |
| Juiciness                | ○ ○ ○ ○ ○ ○ ○ ○ ○ ○                    |  |
| Sweetness                | ○ ○ ○ ○ ○ ○ ○ ○ ○ ○                    |  |
| Acidity                  | ○ ○ ○ ○ ○ ○ ○ ○ ○ ○                    |  |
| Astringency              | ○ ○ ○ ○ ○ ○ ○ ○ ○ ○                    |  |
| Peel texture             | ○ ○ ○ ○ ○ ○ ○ ○ ○ ○                    |  |
| Flavour                  | ○ ○ ○ ○ ○ ○ ○ ○ ○ ○                    |  |
| AFTERTASTE SENSATIONS    |                                        |  |
| Abnormal flavors         | ○ ○ ○ ○ ○ ○ ○ ○ ○ ○                    |  |
